# Supplementary material
Source: ML conference proceedings conference paper supplement (https://openreview.net/forum?id=ZmOmEJn5MM)
Supplement: supplementary_material [file supplementary.pdf › supplementary.pdf]

## 7 SUPPLEMENTARY MATERIALS

### 7.1 IMPLEMENTATION DETAILS

We build our work on top of 2DQuant’s open sourced repository [Liu et al. \(2024\)](#), and use SwinIR-light [Liang et al. \(2021\)](#) as the model backbone of our method. For the Hadamard transform and statistical tests, we use SciPy [Virtanen et al. \(2020\)](#). For finetuning, we use the Adam [Kinga et al. \(2015\)](#) optimizer with a learning rate of  $1 * 10^{-2}$  and betas set to (0.9, 0.999). We clip all gradient values to between  $[-1, 1]$  and we finetune for at most 4000 iterations, or until we reach a nan gradient which we handle by safely exiting. We select the model with the highest PSNR and SSIM. For measuring the time and space complexity of our model, we calculate inference time in seconds and size of model parameters in MB. Our code is written with PyTorch [Paszke et al. \(2019\)](#) and runs for at most 7 hours on one NVIDIA RTX 6000 48G GPU. The anonymous open source code for this paper along with instructions can be found [here](#).

### 7.2 RESULTS

| Method ( $\times 2$ ) | Bit | Set5         |               | Set14        |               | B100         |               | Urban100     |               | Manga109     |               |
|-----------------------|-----|--------------|---------------|--------------|---------------|--------------|---------------|--------------|---------------|--------------|---------------|
|                       |     | PSNR         | SSIM          |
| SwinIR-light          | 32  | 38.15        | 0.9611        | 33.86        | 0.9206        | 32.31        | 0.9012        | 32.76        | 0.9340        | 39.11        | 0.9781        |
| Bicubic               | 32  | 32.25        | 0.9118        | 29.25        | 0.8406        | 28.68        | 0.8104        | 25.96        | 0.8088        | 29.17        | 0.9128        |
| PTQ4ViT               | 4   | 37.43        | 0.9571        | 33.19        | 0.9139        | 31.84        | 0.8950        | 31.54        | 0.9212        | 37.59        | 0.9735        |
| NoisyQuant            | 4   | 37.50        | 0.9570        | 33.06        | 0.9101        | 31.73        | 0.8936        | 31.31        | 0.9181        | 37.47        | 0.9723        |
| 2DQuant               | 4   | 37.87        | 0.9594        | 33.41        | 0.9161        | 32.02        | 0.8971        | 31.84        | 0.9251        | 38.31        | 0.9761        |
| CondiQuant            | 4   | 38.03        | 0.9605        | 33.50        | 0.9180        | 32.16        | 0.8993        | 32.03        | 0.9282        | 38.57        | 0.9769        |
| CompSRT (ours)        | 4   | <b>38.13</b> | <b>0.9610</b> | <b>33.81</b> | <b>0.9203</b> | <b>32.28</b> | <b>0.9009</b> | <b>32.57</b> | <b>0.9325</b> | <b>38.98</b> | <b>0.9778</b> |
| PTQ4ViT               | 3   | 36.49        | 0.9510        | 32.49        | 0.9045        | 31.27        | 0.8854        | 30.16        | 0.9027        | 36.41        | 0.9673        |
| NoisyQuant            | 3   | 35.32        | 0.9334        | 31.88        | 0.8911        | 30.73        | 0.8710        | 29.28        | 0.8835        | 35.30        | 0.9537        |
| 2DQuant               | 3   | 37.32        | 0.9567        | 32.35        | 0.9106        | 31.60        | 0.8911        | 30.45        | 0.9086        | 37.24        | 0.9722        |
| CondiQuant            | 3   | 37.77        | 0.9594        | 33.21        | 0.9151        | 31.94        | 0.8966        | 31.18        | 0.9197        | 38.01        | 0.9755        |
| CompSRT (ours)        | 3   | <b>38.11</b> | <b>0.9609</b> | <b>33.82</b> | <b>0.9202</b> | <b>32.27</b> | <b>0.9008</b> | <b>32.53</b> | <b>0.9321</b> | <b>38.90</b> | <b>0.9775</b> |
| PTQ4ViT               | 2   | 33.25        | 0.8923        | 30.22        | 0.8402        | 29.21        | 0.8066        | 27.31        | 0.8111        | 32.75        | 0.9093        |
| NoisyQuant            | 2   | 30.13        | 0.7620        | 28.80        | 0.7536        | 28.26        | 0.7421        | 26.68        | 0.7627        | 30.40        | 0.8204        |
| 2DQuant               | 2   | 36.00        | 0.9497        | 31.98        | 0.9012        | 30.91        | 0.8810        | 28.62        | 0.8819        | 34.40        | 0.9602        |
| CondiQuant            | 2   | 37.15        | 0.9567        | 32.74        | 0.9103        | 31.55        | 0.8912        | 29.96        | 0.9047        | 36.63        | 0.9713        |
| CompSRT (ours)        | 2   | <b>38.03</b> | <b>0.9605</b> | <b>33.70</b> | <b>0.9194</b> | <b>32.19</b> | <b>0.9294</b> | <b>32.22</b> | <b>0.9294</b> | <b>38.69</b> | <b>0.9770</b> |

Table 6: Performance comparison with SOTA methods for scale factor ( $\times 2$ ) across different bit widths. All comparative results are taken from SwinIR-light [Liang et al. \(2021\)](#), PTQ4ViT [Yuan et al. \(2024\)](#), NoisyQuant [Liu et al. \(2023\)](#), 2DQuant [Liu et al. \(2024\)](#), and CondiQuant [Liu et al. \(2025\)](#). Our method achieves superior performance across all datasets and bitwidths.

| Method ( $\times 3$ ) | Bit | Set5         |               | Set14        |               | B100         |               | Urban100     |               | Manga109     |               |
|-----------------------|-----|--------------|---------------|--------------|---------------|--------------|---------------|--------------|---------------|--------------|---------------|
|                       |     | PSNR         | SSIM          |
| SwinIR-light          | 32  | 34.63        | 0.9290        | 30.54        | 0.8464        | 29.20        | 0.8082        | 28.66        | 0.8624        | 33.99        | 0.9478        |
| Bicubic               | 32  | 29.54        | 0.8516        | 27.04        | 0.7551        | 26.78        | 0.7187        | 24.00        | 0.7144        | 26.16        | 0.8384        |
| PTQ4ViT               | 4   | 33.77        | 0.9201        | 29.75        | 0.8272        | 28.62        | 0.7942        | 27.43        | 0.8361        | 32.50        | 0.9360        |
| NoisyQuant            | 4   | 33.13        | 0.9122        | 29.06        | 0.8093        | 27.93        | 0.7754        | 26.66        | 0.8143        | 31.94        | 0.9293        |
| 2DQuant               | 4   | 34.06        | 0.9231        | 30.12        | 0.8374        | 28.89        | 0.7988        | 27.69        | 0.8405        | 32.88        | 0.9389        |
| CondiQuant            | 4   | 34.32        | 0.9260        | 30.29        | 0.8417        | 29.05        | 0.8039        | 28.05        | 0.8506        | 33.23        | 0.9431        |
| CompSRT (ours)        | 4   | <b>34.56</b> | <b>0.9284</b> | <b>30.49</b> | <b>0.8454</b> | <b>29.17</b> | <b>0.8075</b> | <b>28.50</b> | <b>0.8598</b> | <b>33.83</b> | <b>0.9467</b> |
| PTQ4ViT               | 3   | 32.75        | 0.9028        | 29.14        | 0.8113        | 28.06        | 0.7712        | 26.43        | 0.8014        | 31.20        | 0.9131        |
| NoisyQuant            | 3   | 30.78        | 0.8511        | 27.94        | 0.7624        | 26.98        | 0.7153        | 25.43        | 0.7481        | 29.64        | 0.8792        |
| 2DQuant               | 3   | 33.24        | 0.9135        | 29.56        | 0.8255        | 28.50        | 0.7873        | 26.65        | 0.8116        | 31.46        | 0.9235        |
| CondiQuant            | 3   | 33.92        | 0.9224        | 30.02        | 0.8367        | 28.84        | 0.7986        | 27.37        | 0.8356        | 32.48        | 0.9367        |
| CompSRT (ours)        | 3   | <b>34.54</b> | <b>0.9281</b> | <b>30.48</b> | <b>0.8451</b> | <b>29.16</b> | <b>0.8070</b> | <b>28.47</b> | <b>0.8589</b> | <b>33.79</b> | <b>0.9465</b> |
| PTQ4ViT               | 2   | 29.96        | 0.7901        | 27.36        | 0.7030        | 26.74        | 0.6590        | 24.56        | 0.6460        | 27.37        | 0.7390        |
| NoisyQuant            | 2   | 27.53        | 0.6641        | 25.77        | 0.5952        | 25.37        | 0.5613        | 23.59        | 0.5739        | 26.03        | 0.6632        |
| 2DQuant               | 2   | 31.62        | 0.8887        | 28.54        | 0.8038        | 27.85        | 0.7679        | 25.30        | 0.7685        | 28.46        | 0.8814        |
| CondiQuant            | 2   | 33.00        | 0.9130        | 29.44        | 0.8253        | 28.45        | 0.7882        | 26.36        | 0.8080        | 30.88        | 0.9203        |
| CompSRT (ours)        | 2   | <b>34.17</b> | <b>0.9248</b> | <b>30.21</b> | <b>0.8401</b> | <b>28.97</b> | <b>0.8017</b> | <b>27.86</b> | <b>0.8456</b> | <b>33.11</b> | <b>0.9414</b> |

Table 7: Performance comparison with SOTA methods for scale factor ( $\times 3$ ) across different bit widths. All comparative results are taken from SwinIR-light [Liang et al. \(2021\)](#), PTQ4ViT [Yuan et al. \(2024\)](#), NoisyQuant [Liu et al. \(2023\)](#), 2DQuant [Liu et al. \(2024\)](#), and CondiQuant [Liu et al. \(2025\)](#). Our method achieves superior performance across all datasets and bitwidths.

### 7.3 LLM USAGE

We used LLMs to assist—but not replace—our research workflow. Specifically, LLMs were employed to (i) help draft and refactor code snippets and experimental scripts, (ii) brainstorm and clarify ideas and concepts discussed in the paper, (iii) suggest edits and critiques on early drafts, and (iv) provide limited writing assistance for grammar and phrasing. All model outputs were reviewed, verified, and, where needed, rewritten by the authors; we independently implemented, tested, and validated every algorithmic choice and experimental result reported. No proprietary, confidential, or unreleased data were provided to the models. LLMs were not used to generate or fabricate data, analyses, or citations, and they are not listed as authors. The authors bear full responsibility for the paper’s content, including the correctness of code, experiments, and references.
